# Supplementary material for: NAT10 regulates p53 activation through acetylating p53 at K120 and ubiquitinating Mdm2
Source: PubMed Central journal article supplement — EMBO Rep. 2016 Feb 5;17(3):349–66. doi: 10.15252/embr.201540505 (PMC4772976; doi:10.15252/embr.201540505), 2016-02-05
Supplement: EMBR-17-349-s003.pdf [file EMBR-17-349-s003.pdf]

Manuscript EMBO-2015-40505

## **Nucleolar protein NAT10 regulates p53 activation through acetylating p53 at K120 and ubiquitinating Mdm2**

Xiaofeng Liu, Yuqin Tan, Chunfeng Zhang, Ying Zhang, Liangliang Zhang, Pengwei Ren, Hongkui Deng, Jianyuan Luo, Yang Ke, Xiaojuan Du

*Corresponding author: Xiaojuan Du, Peking University Health Science Center*

---

### **Review timeline:**

|                     |                   |
|---------------------|-------------------|
| Submission date:    | 07 April 2015     |
| Editorial Decision: | 20 May 2015       |
| Revision received:  | 18 September 2015 |
| Editorial Decision: | 06 November 2015  |
| Revision received:  | 14 November 2015  |
| Accepted:           | 11 January 2016   |

---

Editor: Martina Rembold

### **Transaction Report:**

No Peer Review Process File is available with this article, as the authors have chosen not to make the review process public in this case.
