# Supplementary figures and images for: NAT10 regulates p53 activation through acetylating p53 at K120 and ubiquitinating Mdm2
Source: PubMed Central journal article supplement — EMBO Rep. 2016 Feb 5;17(3):349–66. doi: 10.15252/embr.201540505 (PMC4772976; doi:10.15252/embr.201540505), 2016-02-05

Source Data for Figure 6C

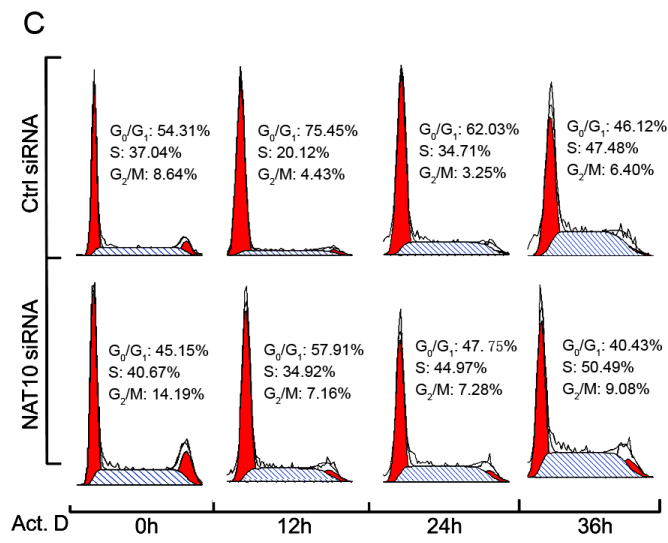

Supplement: EMBR-17-349-s002.pdf [file EMBR-17-349-s002.pdf]
